# Supplementary material for: A Novel Seedless TSV Process Based on Room Temperature Curing Silver Nanowires ECAs for MEMS Packaging
Source: PubMed Central journal article supplement (PMC6631795; doi:10.3390/mi10060351), 2019-05-28
Supplement: micromachines-10-00351-s001.pdf [file micromachines-10-00351-s001.pdf]

Article

# A Novel Seedless TSV Process based on Room Temperature Curing Silver Nanowires ECAs for MEMS Packaging

Min Meng <sup>1,2</sup>, Lijuan Cheng <sup>1,2</sup>, Kai Yang <sup>1,2</sup>, Mingyan Sun <sup>3</sup>, and Yi Luo <sup>1,\*</sup>

<sup>1</sup> Microsystem & Terahertz Research Center, China Academy of Engineering Physics (CAEP), Chengdu 610200, China; mengmin@mtrc.ac.cn (M.M.); chenglijuan@mtrc.ac.cn (L.C.); yangkai@mtrc.ac.cn (K.Y.)

<sup>2</sup> Institute of Electronic Engineering, China Academy of Engineering Physics (CAEP), Mianyang 621900, China;

<sup>3</sup> Institute of Machinery Manufacturing Technology, CAEP, Mianyang 621900, China; yanmingsun18@163.com

\* Correspondence: luoyi@mtrc.ac.cn; Tel.: +86-028-6572-6021

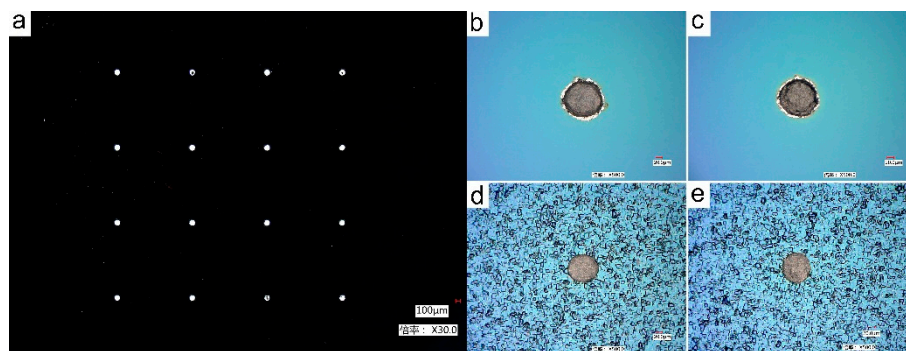

**Figure S1.** (a) Low magnification optical image of the filled TSVs array with overburden layer being removed by a scraper. (b,c) Magnified optical images of the top side of a fully filled TSV randomly selected from (a). (d,e) Magnified optical images of the back side of a fully filled TSV randomly selected from (a).

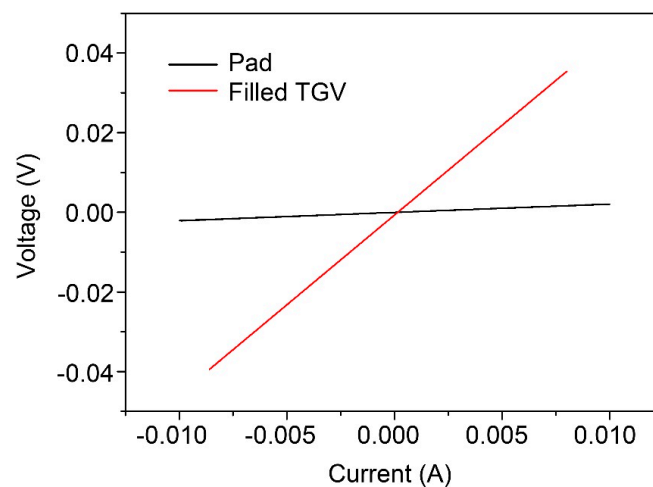

**Figure S2.** I-V measurement curves of a fully filled TGV with 30 wt% silver nanowires ECAs (red) and deposited Ti/Au pad (black).
